# Supplementary material for: Three-step thermodynamic vs. two-step kinetics-limited sulfur reactions in all-solid-state sodium batteries
Source: Royal Society of Chemistry journal article supplement (doi:10.1039/d4ee03160a), 2024-01-01
Supplement: d4ee03160a1.pdf [file d4ee03160a1.pdf]

## Supplementary Information

### Three-Step Thermodynamic vs. Two-Step Kinetic-Limited Sulfur Reactions in All-Solid-State Sodium Batteries

Tongtai Ji<sup>1</sup>, Qingsong Tu<sup>2</sup>, Yang Zhao,<sup>3</sup> Dominik Wierzbicki<sup>4</sup>, Vincent Plisson<sup>5</sup>, Ying Wang<sup>1</sup>, Jiwei Wang<sup>1</sup>, Kenneth S. Burch<sup>5</sup>, Yong Yang<sup>6</sup>, Hongli Zhu<sup>1,\*</sup>

<sup>1</sup>Department of Mechanical and Industrial Engineering, Northeastern University, 360 Huntington Avenue, Boston, Massachusetts 02115, United States

<sup>2</sup>Department of Mechanical Engineering, Rochester Institute of Technology, Rochester, NY 14623, USA

<sup>3</sup>Department of Mechanical and Materials Engineering, University of Western Ontario, London, Ontario N6A 5B9, Canada

<sup>4</sup>National Synchrotron Light Source II, Brookhaven National Laboratory, Upton, NY, 11973 USA

<sup>5</sup>Department of Physics, Boston College, Chestnut Hill, Massachusetts 02467, United States

<sup>6</sup>State Key Laboratory of Physical Chemistry of Solid Surfaces, College of Materials, Xiamen University, Xiamen 361005, China

\*: Corresponding author: Hongli Zhu. E-mail: [h.zhu@neu.edu](mailto:h.zhu@neu.edu)

## Supplementary Discussion 1

### Discussion of the decomposition of the solid electrolyte

In the all-solid-state batteries with sulfide-based SE, it is common that the decomposition of the sulfide-based SE occurs when it intimately contacts with carbon, but the decomposition products are highly reversible during cycling and further protect the unreacted SE.<sup>1,2</sup> The decomposition became obvious when the cells were operated at a slow rate and high temperature. The slow rate and high temperatures under the high voltage ( $> 2.5\text{V}$ ) provide sufficient time and energy for the SE decomposition reaction to take place, resulting in this additional oxidation peak. Supplementary Fig. 4 shows the CV curve of the  $\text{Na}_3\text{PS}_4$  SE when it intimately contacts with carbon at  $90^\circ\text{C}$ . We also evaluated the capacity provided by the catholyte by mixing SE with the PPCF (85:15) as the cathode material, and the specific capacity of the catholyte is around 40-60 mAh/g with high reversibility (Supplementary Fig. 5). Although the decomposition cannot be avoided, it can be effectively limited by controlling the interface between SE and carbon.<sup>2,3</sup> In our work, for the preparation of the composite cathode (S: C: SE= 35: 15: 50), sulfur was first coated on the PPCF by the melting method and further mixed with the SE to minimize the interface between carbon and SE. Based on the capacity ratio from the catholyte, we expect that less than 5% of the total capacity is contributed by the SE decomposition even at  $90^\circ\text{C}$ . This number can be even lower at  $25^\circ\text{C}$ . Therefore, the decomposition of the solid electrolyte will not alter the electrochemical behavior of the sulfur cathode we are studying.

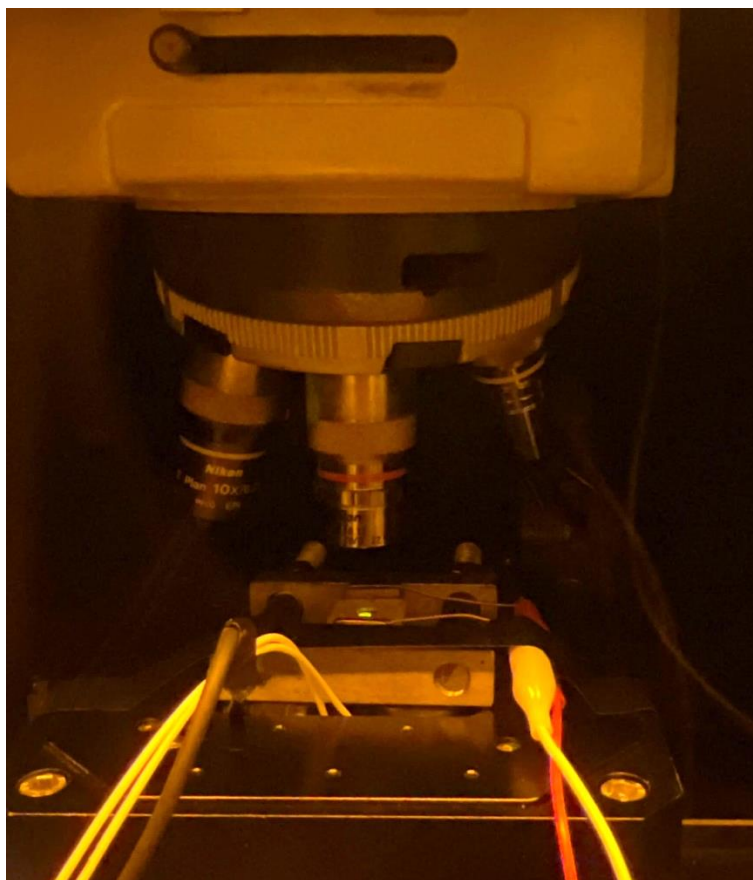

**Figure S1.** Digital image of the setup for the in-situ Raman test in the glovebox

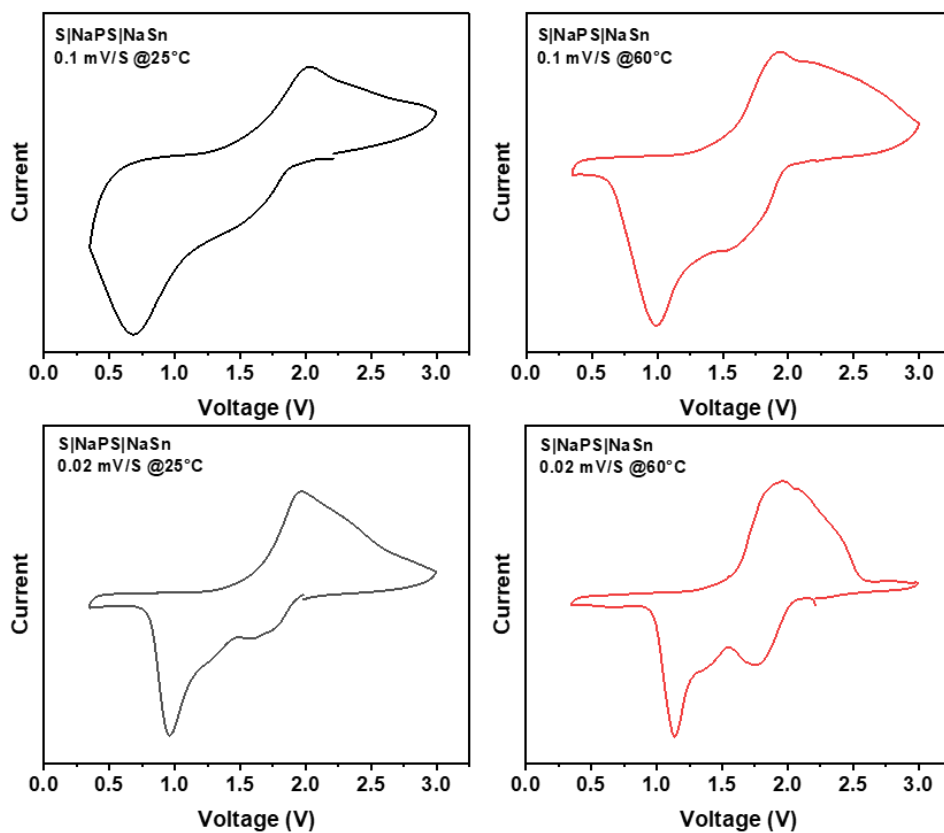

**Figure S2.** Cyclic voltammetry (CV) curves of the all-solid-state sodium-sulfur batteries operated at 25°C (black), 60°C (red) at 0.1 mV/s (up) and 0.02 mV/s (bottom).

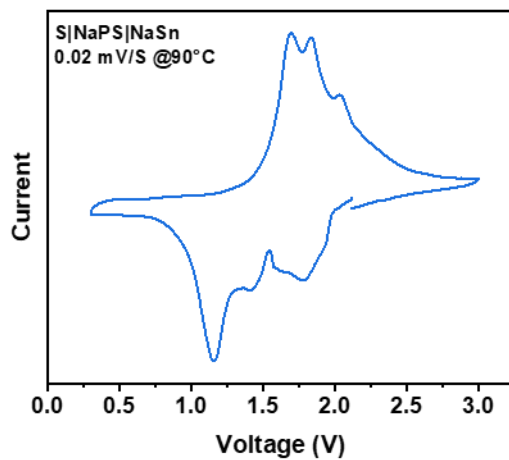

**Figure S3.** CV curves of the all-solid-state sodium-sulfur batteries operated at 90°C under 0.02 mV/s

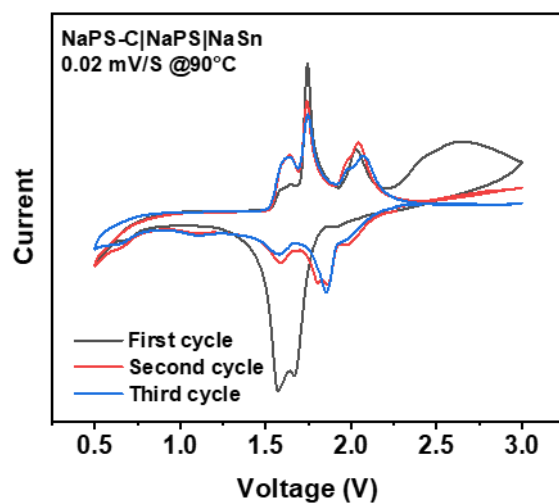

**Figure S4.** The CV curves of  $\text{Na}_3\text{PS}_4$  solid electrolyte at  $90^\circ\text{C}$

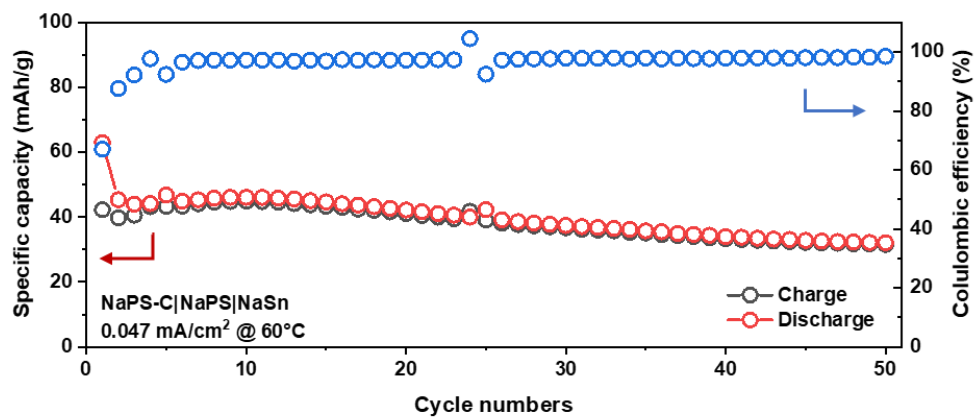

**Figure S5.** Cycling capacity of the all-solid-state battery with  $\text{Na}_3\text{PS}_4$  (mixing with PPCF) as the cathode material at  $60^\circ\text{C}$ .

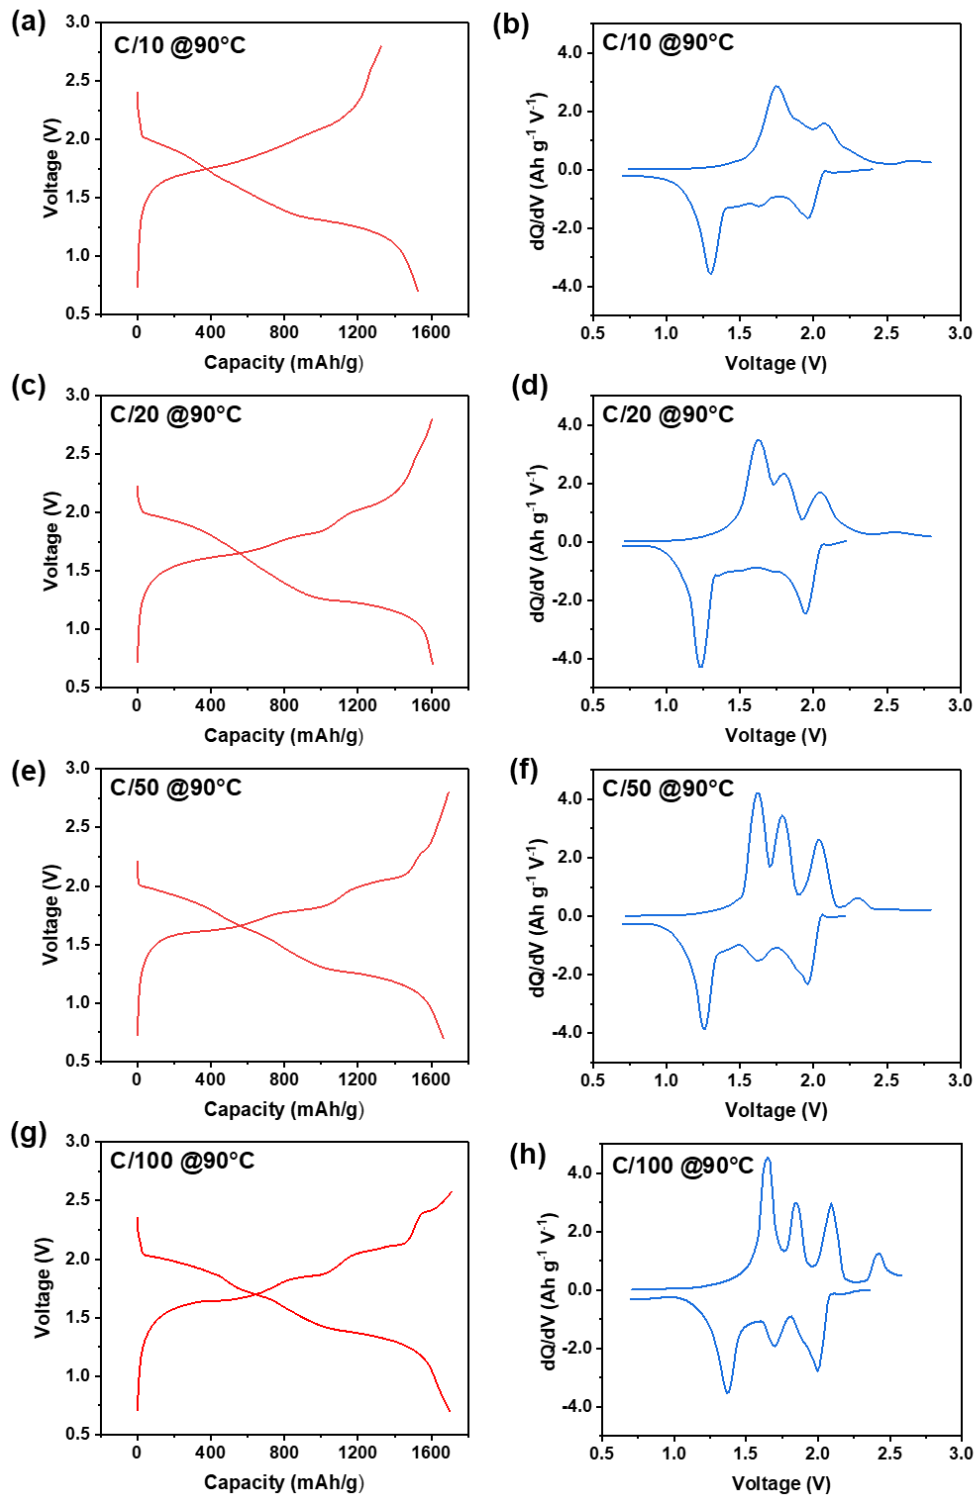

**Figure S6.** The comparison of the galvanostatic voltage profiles of the all-solid-state sodium sulfur batteries at  $90^{\circ}\text{C}$  under (a) C/100, (c) C/50, (e) C/20, and (g) C/10 and corresponding  $dQ/dV$  curves under (b) C/100, (d) C/50, (f) C/20, and (h) C/10.

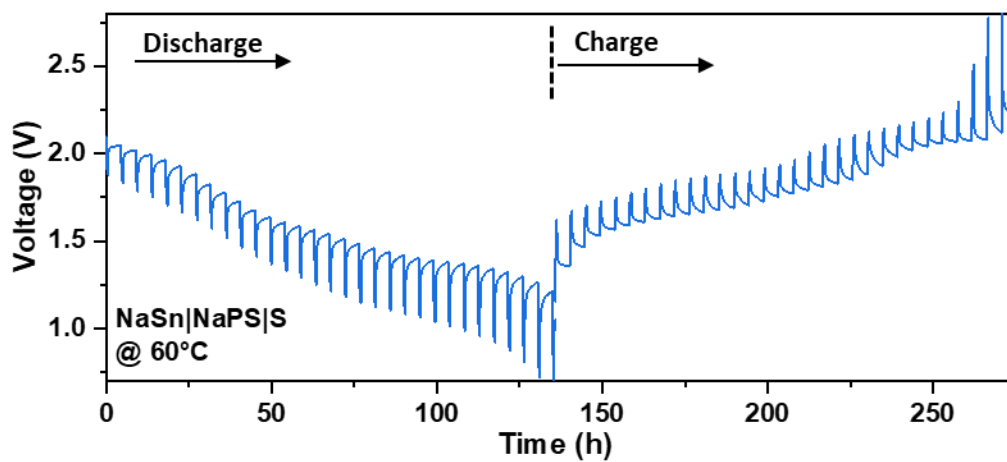

**Figure S7.** Galvanostatic intermittent titration technique (GITT) test profile of the ASSSBs operated at 60°C.

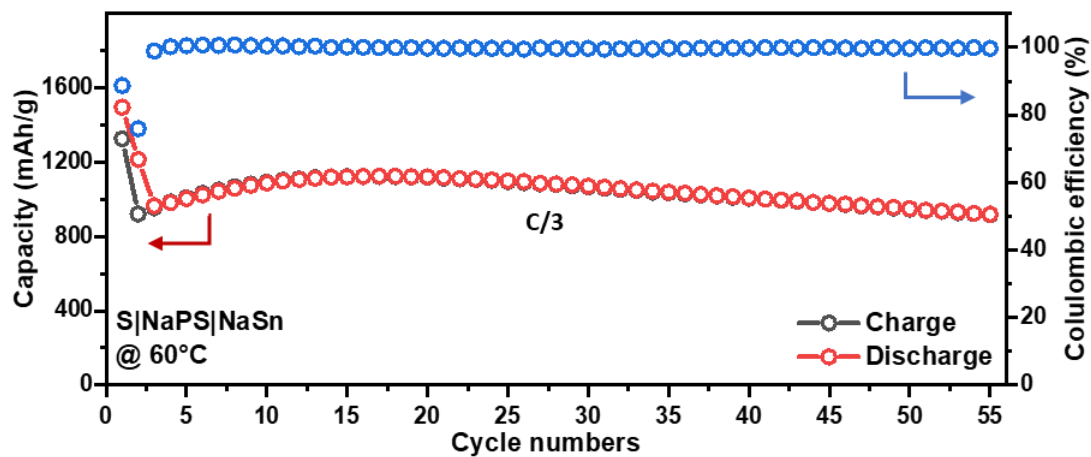

**Figure S8.** The long cycling performance of the ASSSB operated at 60°C.

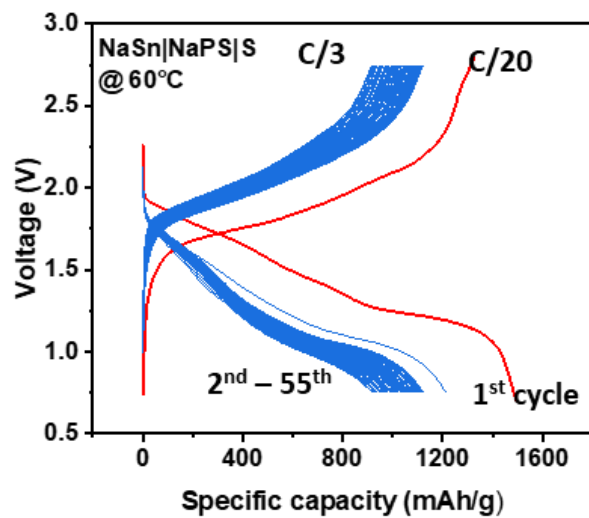

**Figure S9.** Voltage profiles of the long cycling performance of the ASSSB operated at 60°C.

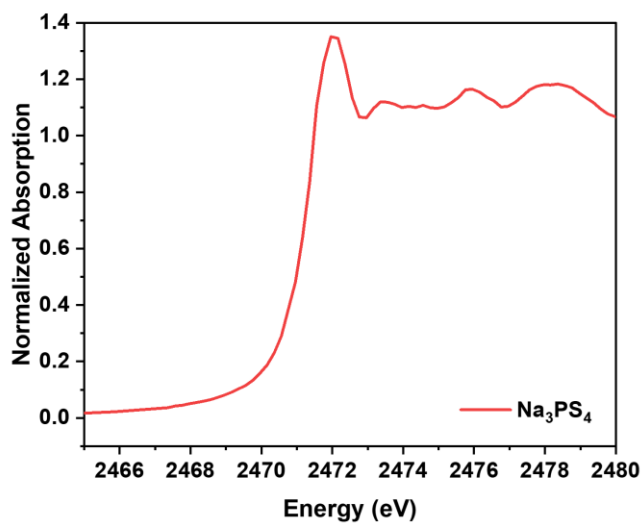

**Figure S10.** S K-edge XANES spectrum of Na<sub>3</sub>PS<sub>4</sub>



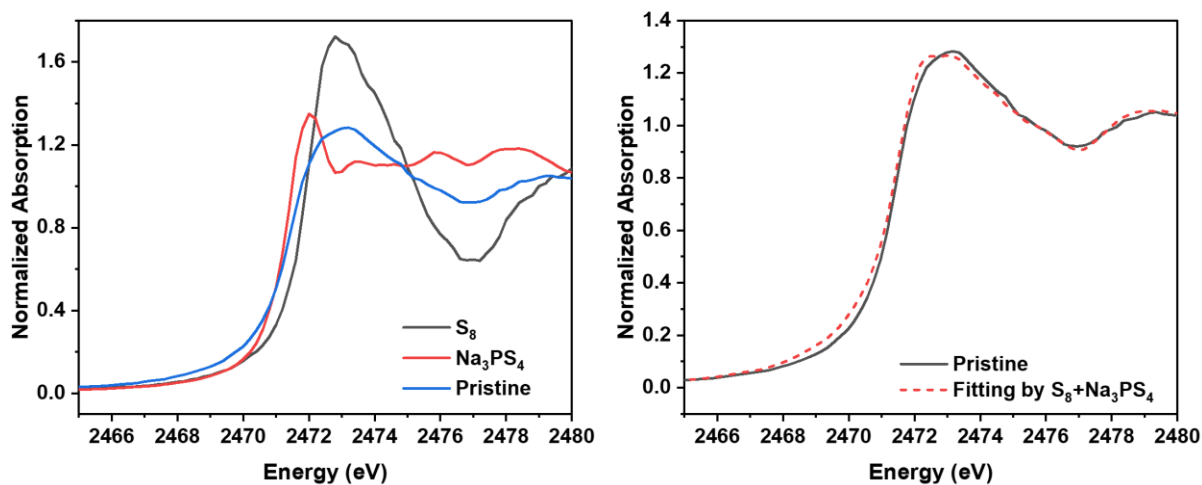

**Figure S11.** (Left) The comparison of the S K-edge XANES spectra of S<sub>8</sub>, Na<sub>3</sub>PS<sub>4</sub>, and Pristine cathode. (Right) The linear combination fitting result of the pristine cathode by S<sub>8</sub> and Na<sub>3</sub>PS<sub>4</sub>.

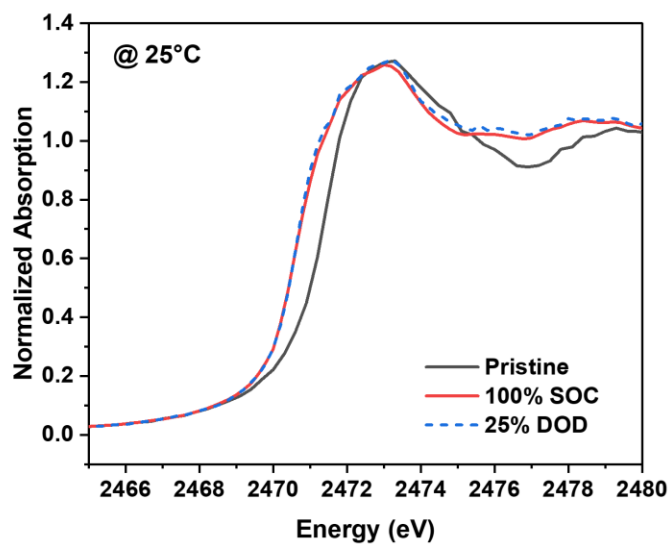

**Figure S12.** The comparison of the Pristine, 25% DOD, and 100% SOC S K-edge XANES spectra at 25°C.

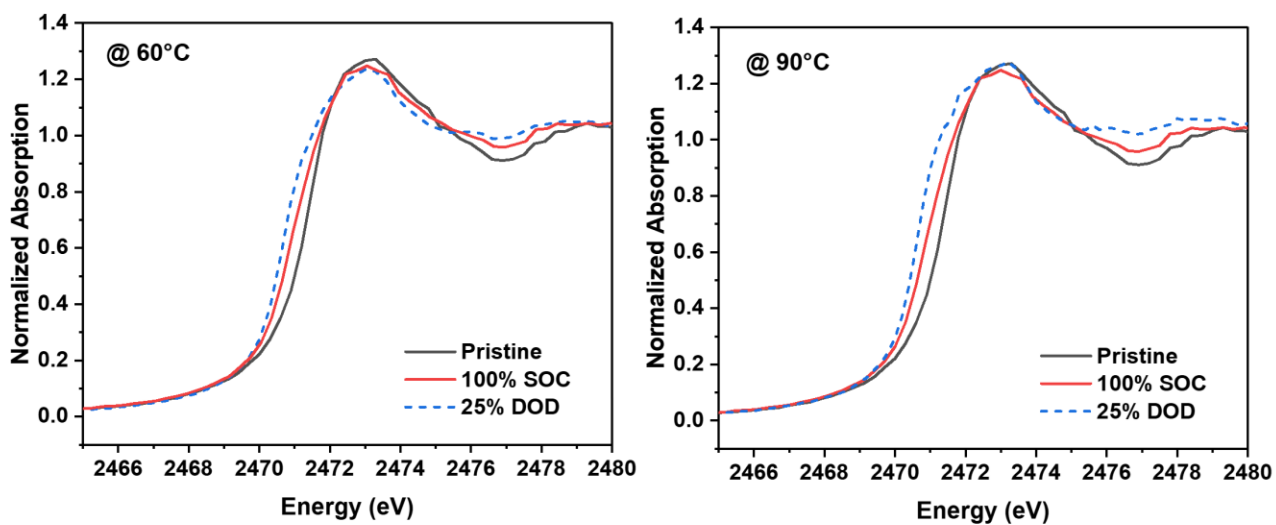

**Figure S13.** The comparison of the Pristine, 25% DOD, and 100% SOC S K-edge XANES spectra at 60°C (left) and 60°C (right).

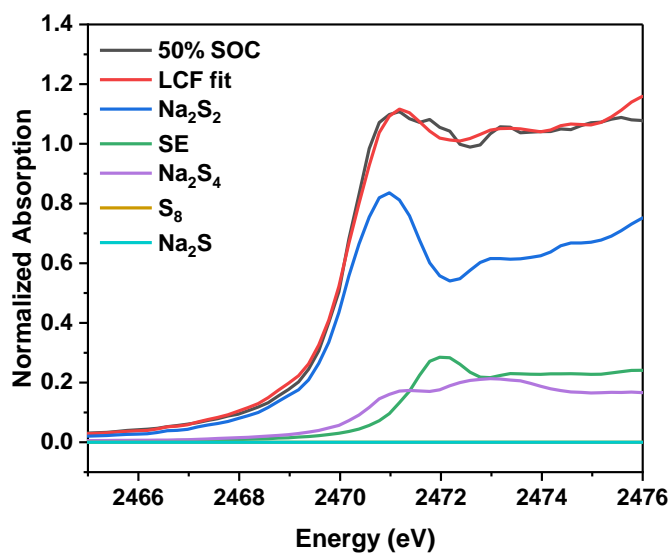

**Figure S14.** Linear combination fitting (LCF) result of the XANES spectrum of the 50% SOC at 90°C and the reference spectra plotted by the weight of their contributions.

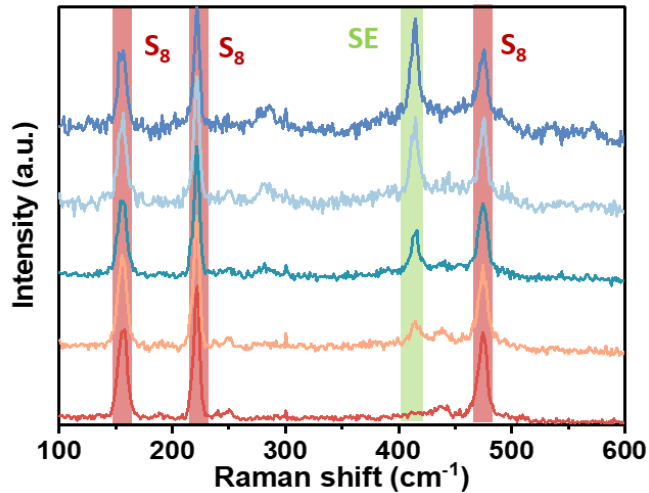

**Figure S15.** Raman spectrum of the pristine composite cathode at different places.

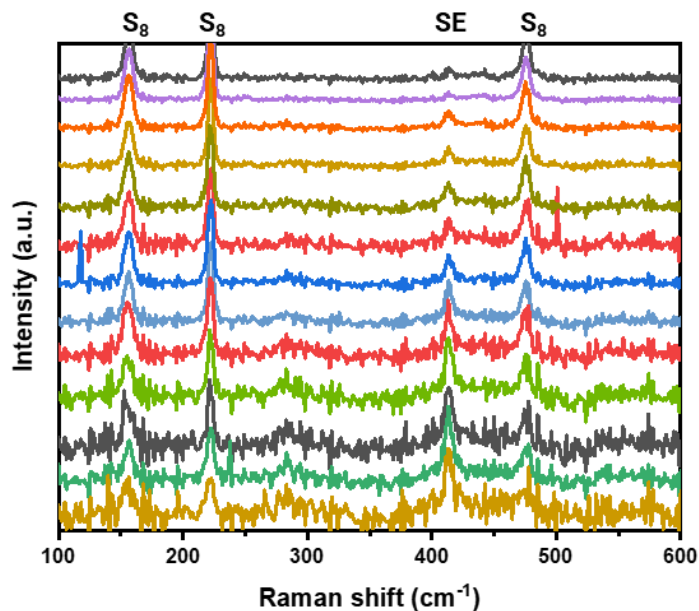

**Figure S16.** Operando Raman measurement for the most surface layer of the sulfur cathode from 0 to 3h, the change of the sulfide species are hard to detect. The change of the intensity of the peaks from  $S_8$  and SE is due to the slight moving of the position.

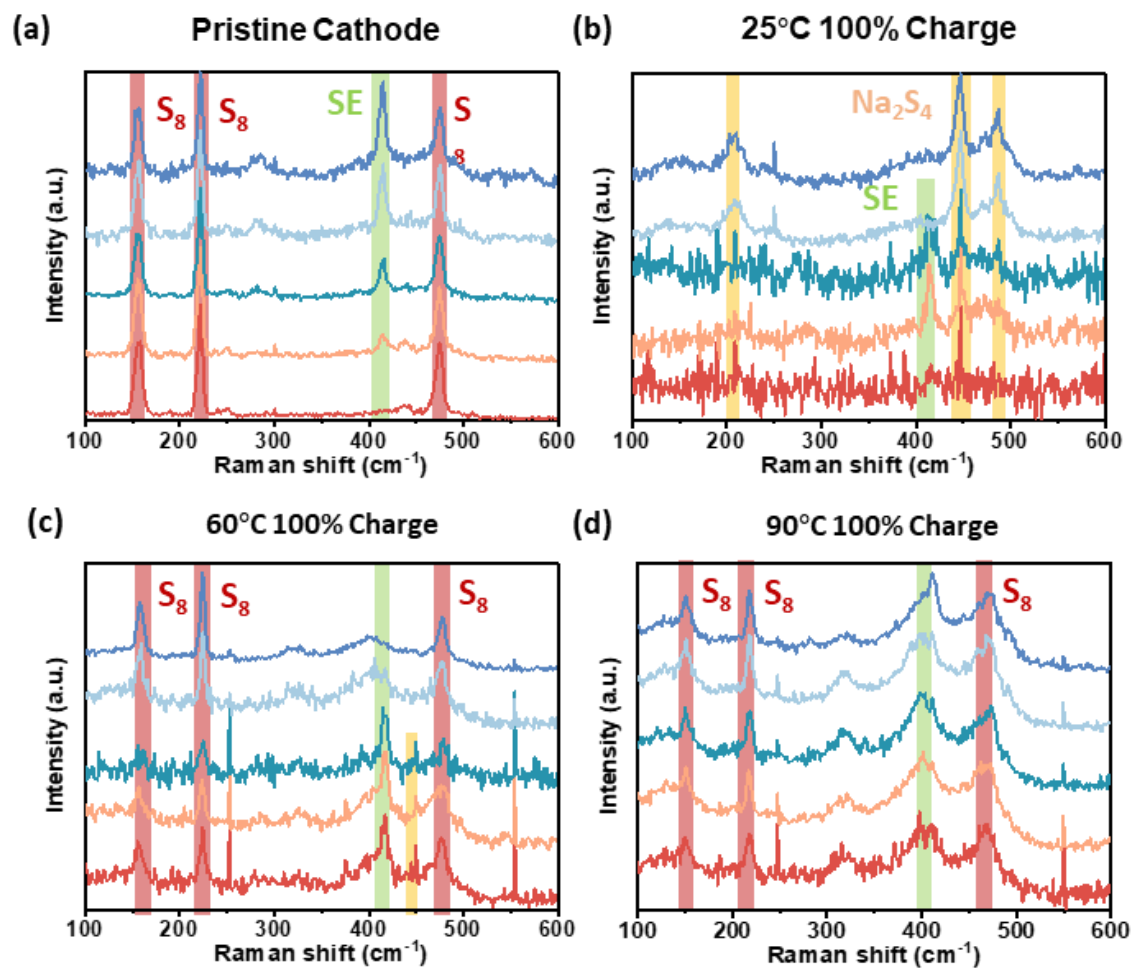

**Figure S17.** Comparison of the ex-situ Raman spectra of (a) pristine cathode, and the cathode at 100% SoC operated at (b) 25°C, (c) 60°C, and (d) 90°C

**Table S1.** Lattice constants of different phases

| Phase                                 | a constant (Å) | b constant (Å) | c constant (Å) | volume (Å <sup>3</sup> /atom) |
|---------------------------------------|----------------|----------------|----------------|-------------------------------|
| <b>4(S8)</b>                          | 8.507          | 8.507          | 13.551         | 27.560                        |
| <b>4(Na<sub>2</sub>S<sub>5</sub>)</b> | 5.784          | 7.677          | 14.529         | 23.041                        |
| <b>4(Na<sub>2</sub>S<sub>4</sub>)</b> | 8.952          | 8.952          | 8.952          | 22.414                        |
| <b>2(Na<sub>2</sub>S<sub>2</sub>)</b> | 4.443          | 4.443          | 10.205         | 21.810                        |
| <b>Na<sub>2</sub>S</b>                | 4.601          | 4.601          | 4.601          | 22.954                        |
| <b>Na<sub>2</sub></b>                 | 3.730          | 3.730          | 6.099          | 36.738                        |

**Equation S1.** Diffusion coefficient calculated by GITT test<sup>4</sup>

$$D = \frac{4}{\pi\tau} \left( \frac{n_m V_m}{S} \right)^2 \left( \frac{\Delta E_s}{\Delta E_t} \right)^2$$

Where,  $\tau$  (s) is the duration of the current pulse;  $n_m$  (mol) is the number of moles of the active material;  $V_m$  (cm<sup>3</sup>/mol) is the molar volume of the electrode;  $S$  (cm<sup>2</sup>) is the electrode area;  $\Delta E_s$  (V) is the steady-state voltage change, due to the current pulse and  $\Delta E_t$  (V) is the voltage change during the constant current pulse, excluding the  $iR$  drop.

## Reference

- 1 Yue, J. *et al.* High-performance all-inorganic solid-state sodium–sulfur battery. *ACS nano* **11**, 4885-4891 (2017).
- 2 Banerjee, A., Wang, X., Fang, C., Wu, E. A. & Meng, Y. S. Interfaces and interphases in all-solid-state batteries with inorganic solid electrolytes. *Chemical reviews* **120**, 6878-6933 (2020).
- 3 Tan, D. H. *et al.* Elucidating reversible electrochemical redox of Li<sub>6</sub>PS<sub>5</sub>Cl solid electrolyte. *ACS Energy Letters* **4**, 2418-2427 (2019).
- 4 Jia, M. *et al.* Re-understanding the galvanostatic intermittent titration technique: Pitfalls in evaluation of diffusion coefficients and rational suggestions. *Journal of Power Sources* **543**, 231843 (2022).
